# Supplementary material for: Modification and Targeted Design of N-Terminal Truncates Derived from Brevinin with Improved Therapeutic Efficacy
Source: PubMed Central journal article supplement (PMC7464788; doi:10.3390/biology9080209), 2020-08-06
Supplement: biology-09-00209-s001.pdf [file biology-09-00209-s001.pdf]

hhy\_200730154328 #984 RT: 12.53 AV: 1 NL: 8.42E3  
F: ITMS + c ESI Full ms [350.00-1600.00]

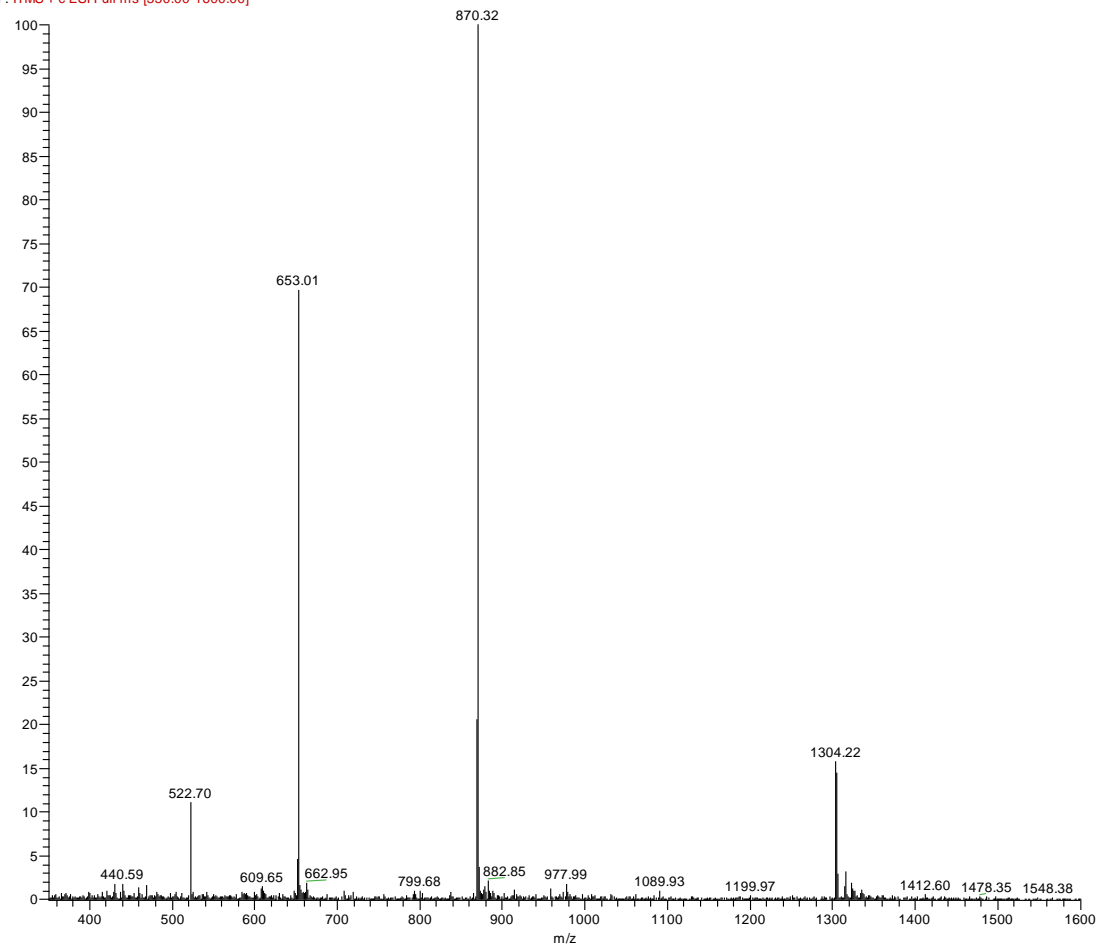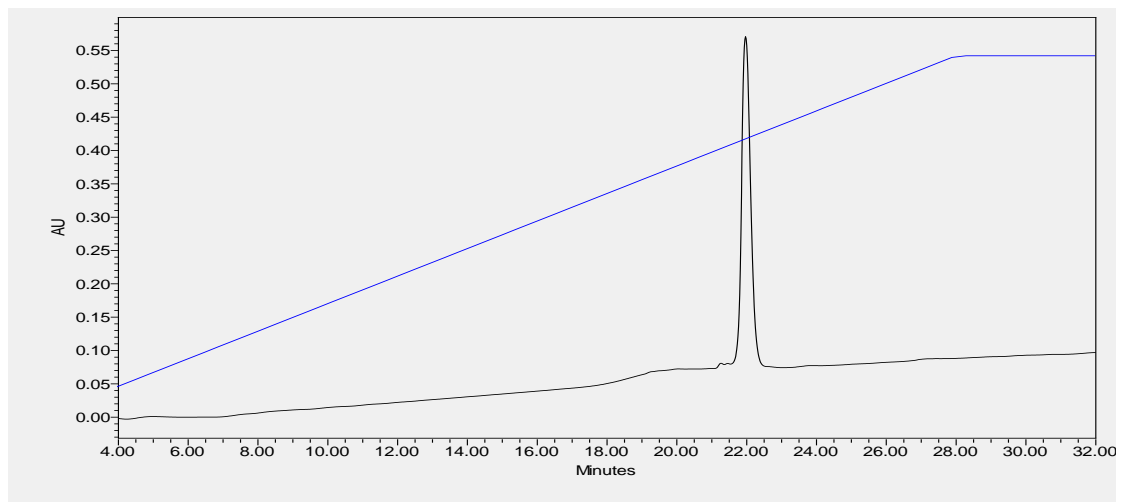

(a)

hhy\_200730184524 #62 RT: 0.85 AV: 1 NL: 4.51E4  
F: ITMS + c ESI Full ms [350.00-2000.00]

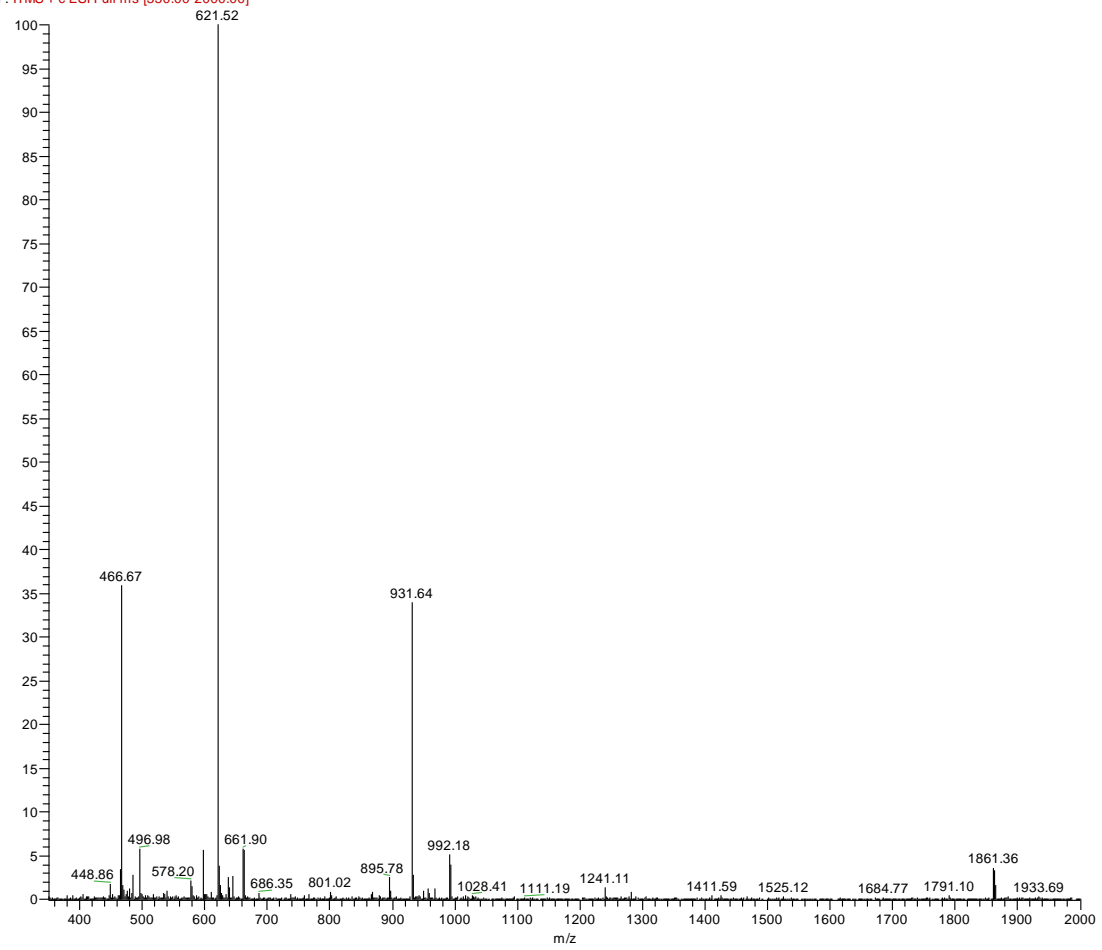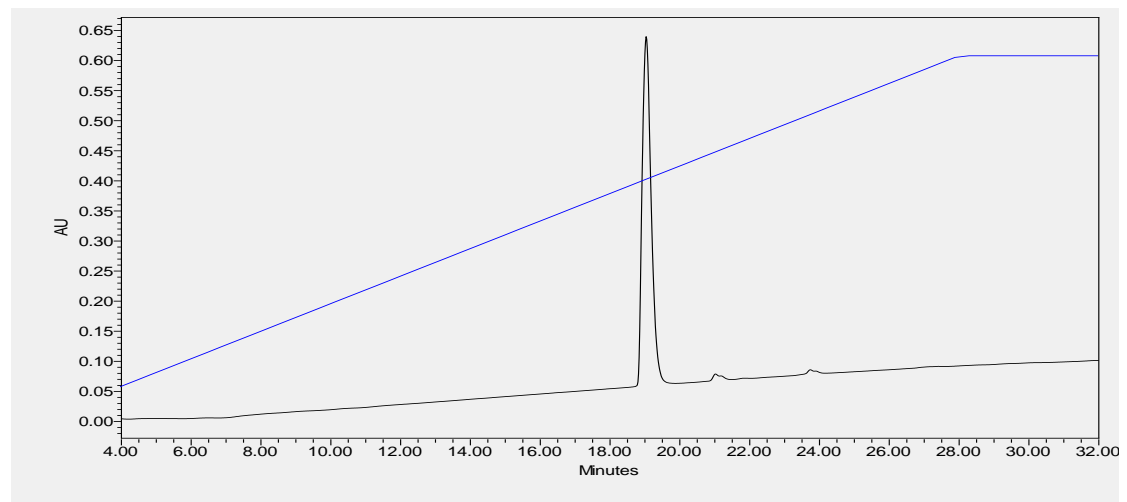

(b)

hhy\_200730185236 #13 RT: 0.17 AV: 1 NL: 5.39E4  
F: ITMS + c ESI Full ms [350.00-2000.00]

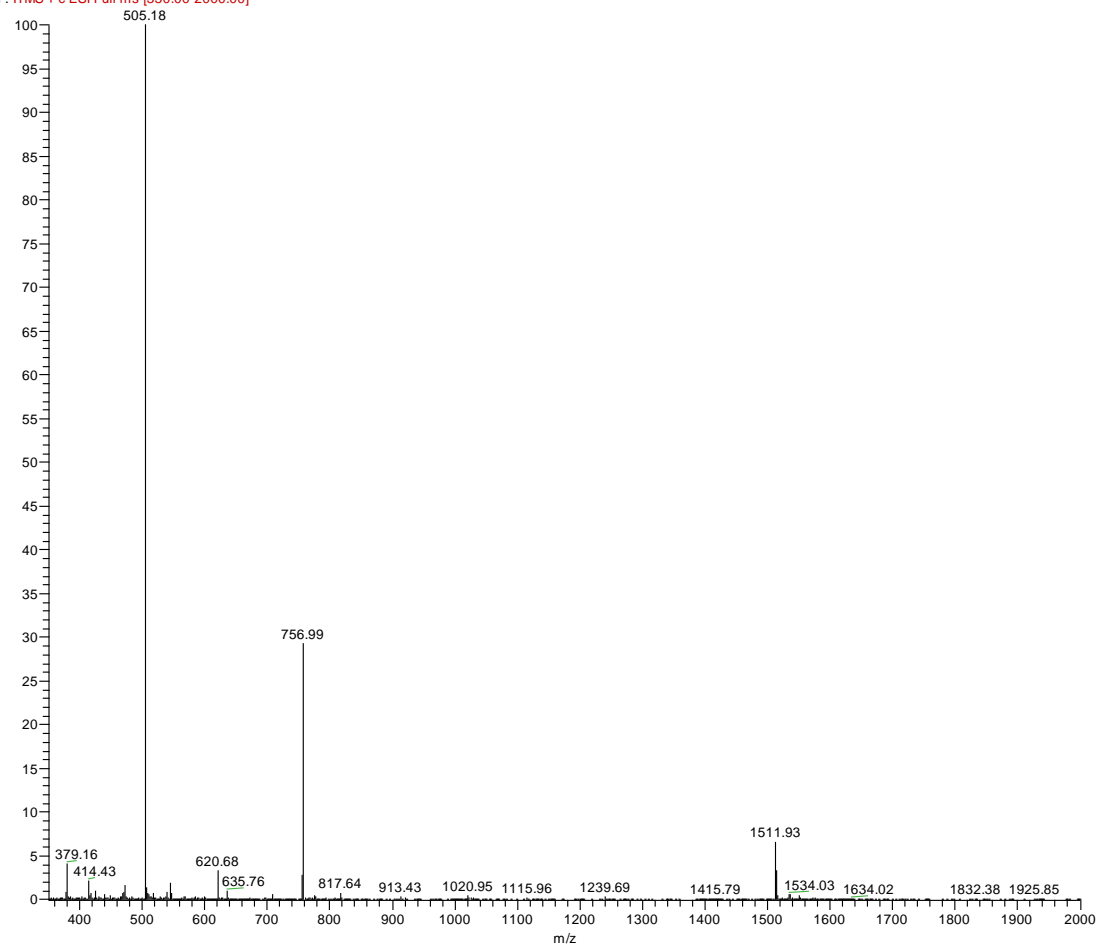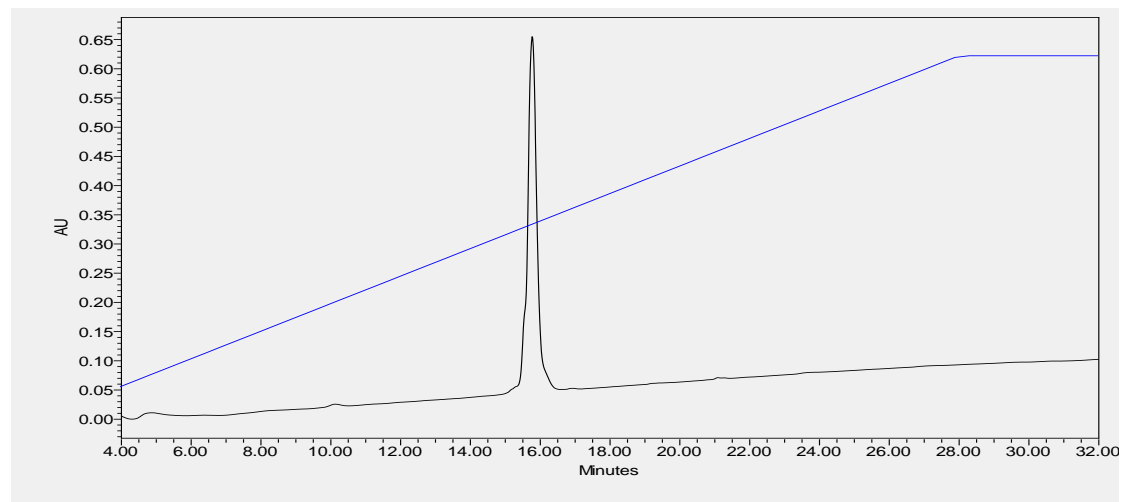

(c)

hhy\_200730154328 #368 RT: 4.87 AV: 1 NL: 2.98E4  
F: ITMS + c ESI Full ms [350.00-1600.00]

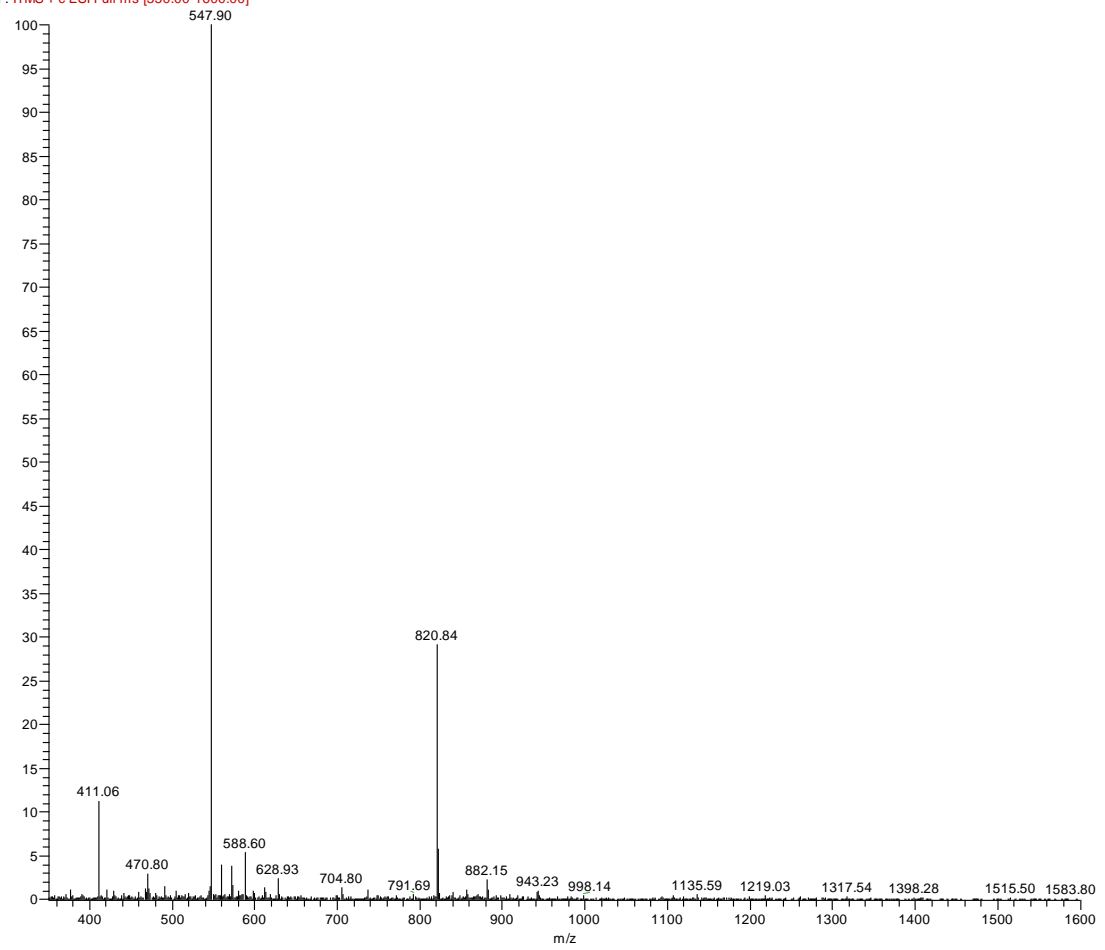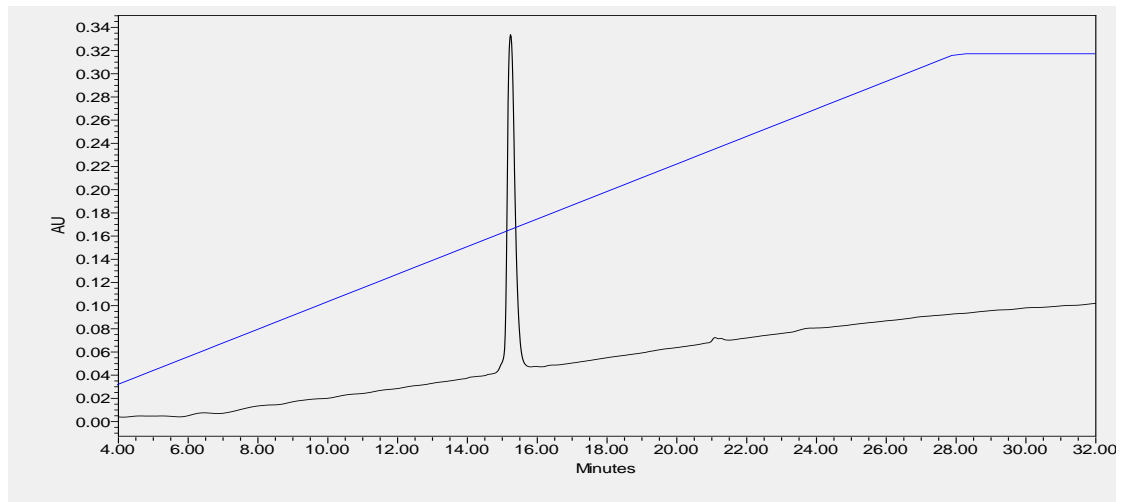

(d)

hhy\_200730154328 #412 RT: 5.42 AV: 1 NL: 9.47E4  
F: ITMS + c ESI Full ms [350.00-1600.00]

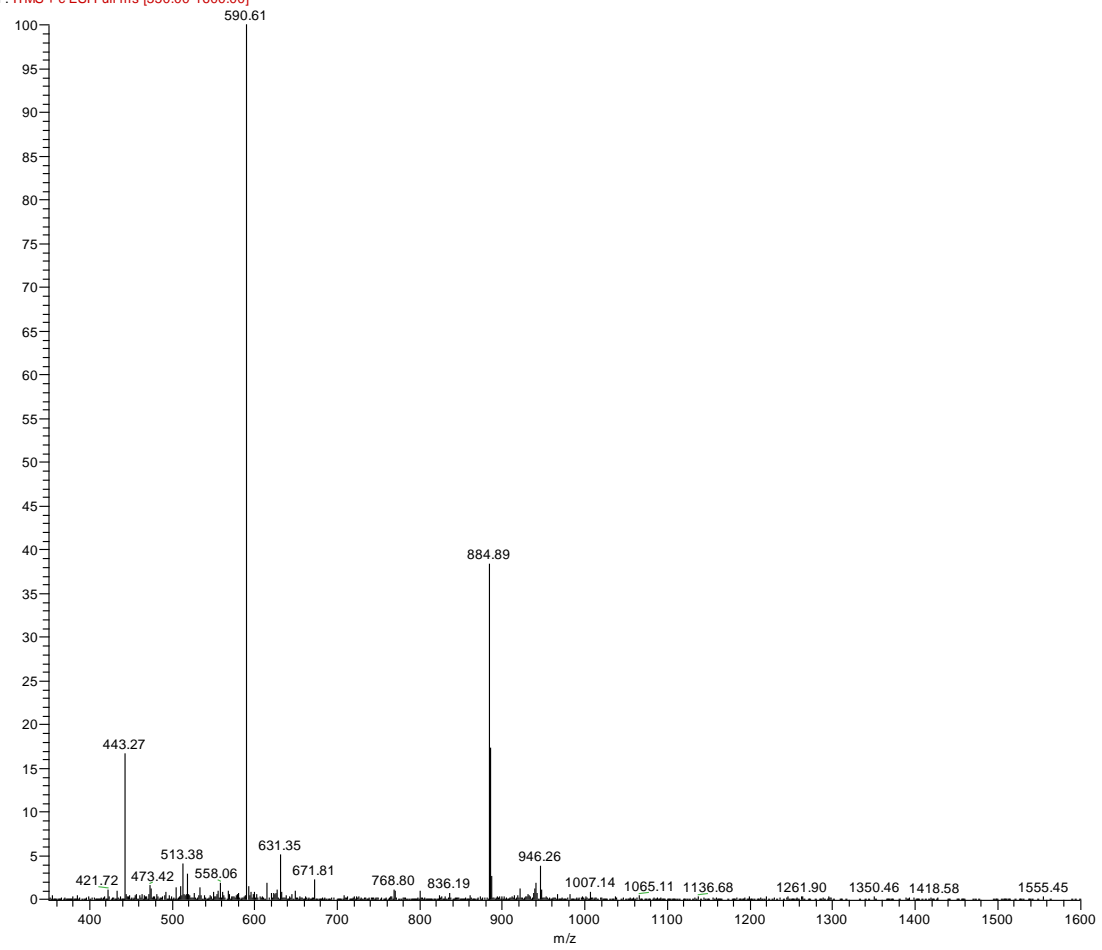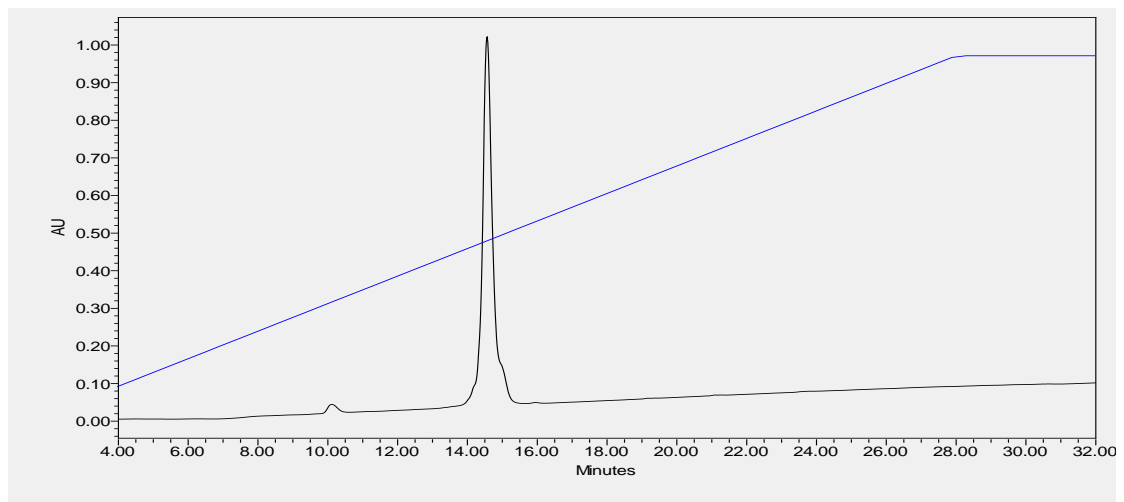

(e)

hhy\_200730174137 #27 RT: 0.41 AV: 1 NL: 1.21E4  
F: ITMS + c ESI Full ms [350.00-2000.00]

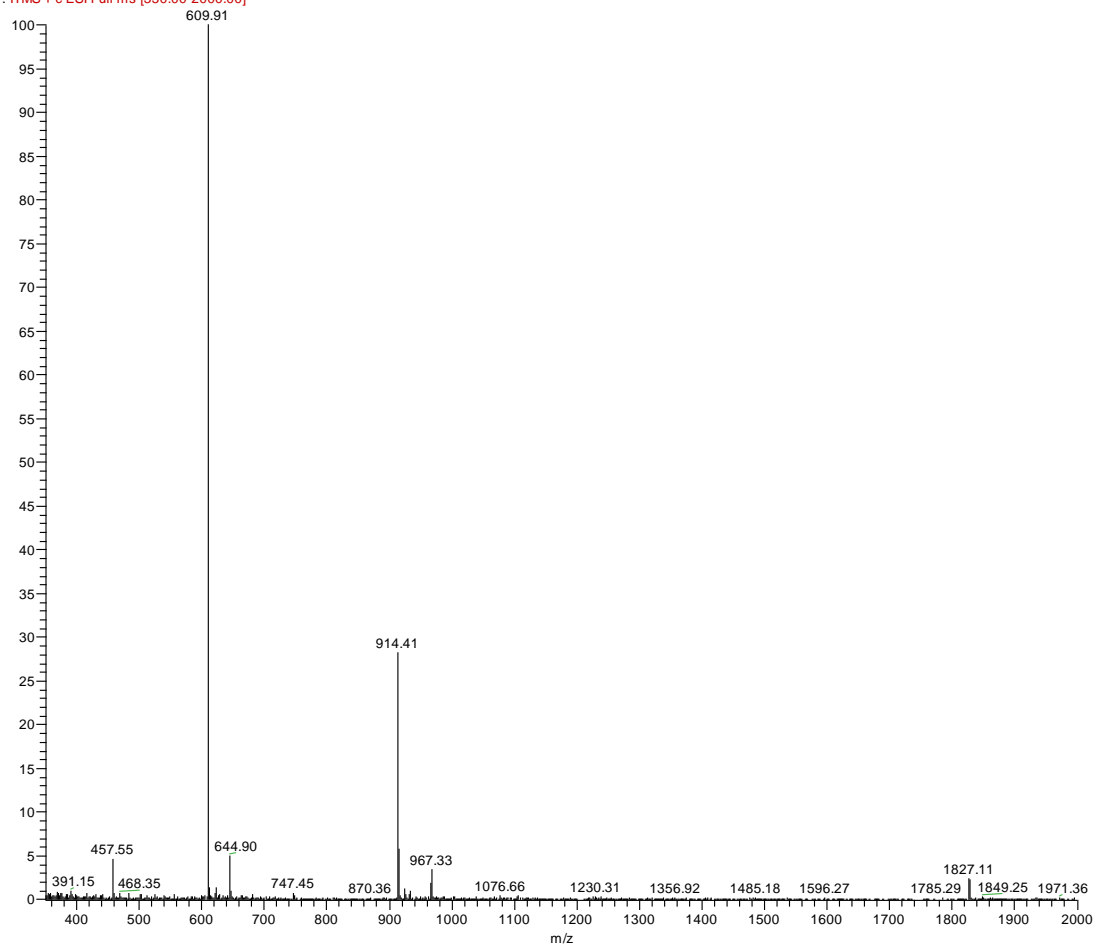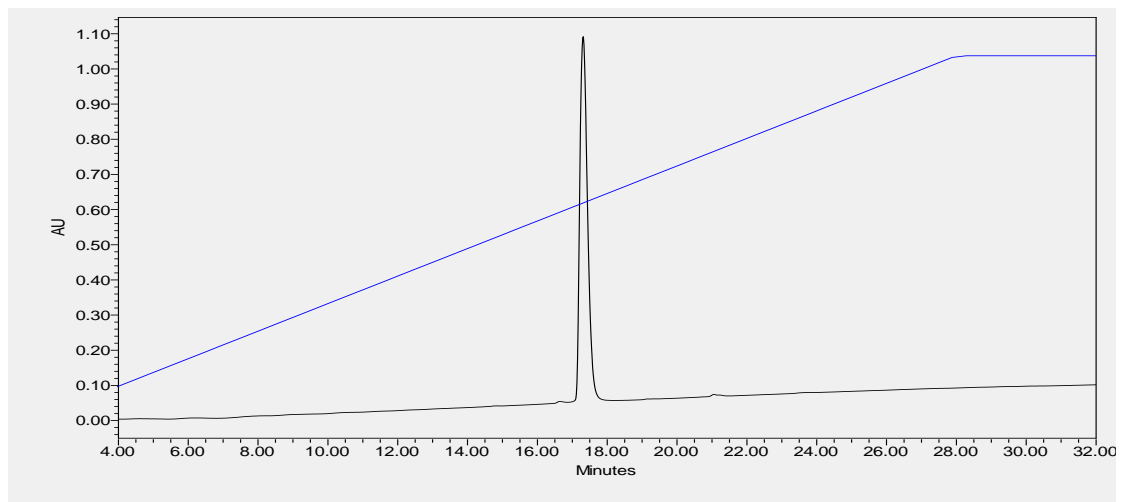

(f)

hhy\_200730154328 #567 RT: 7.30 AV: 1 NL: 7.34E4  
F: ITMS + c ESI Full ms [350.00-1600.00]

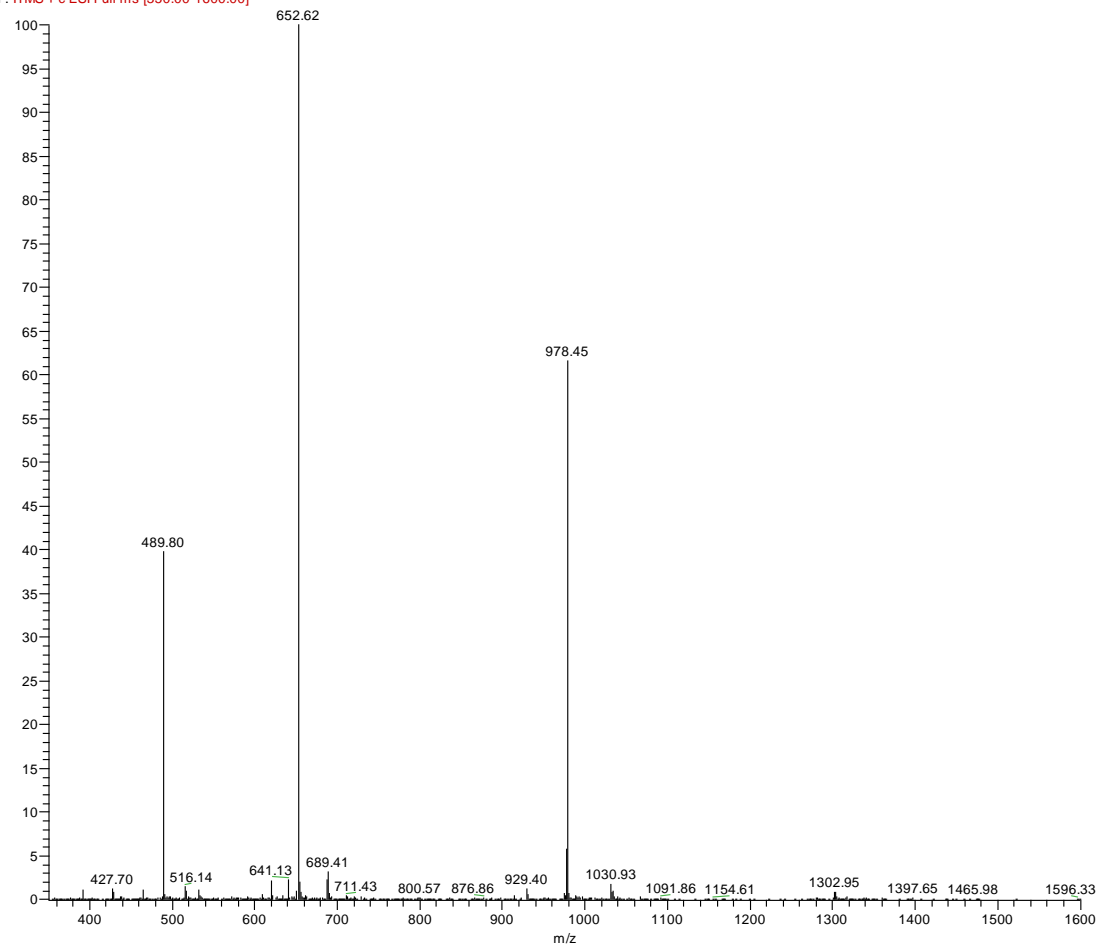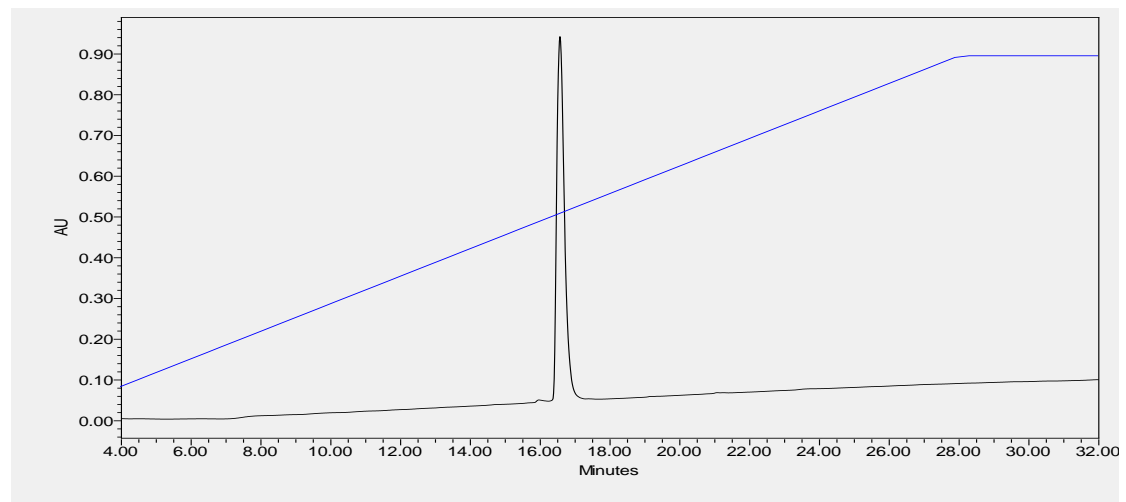

(g)

hhy\_200730154328 #753 RT: 9.62 AV: 1 NL: 3.35E4  
F: ITMS + c ESI Full ms [350.00-1600.00]

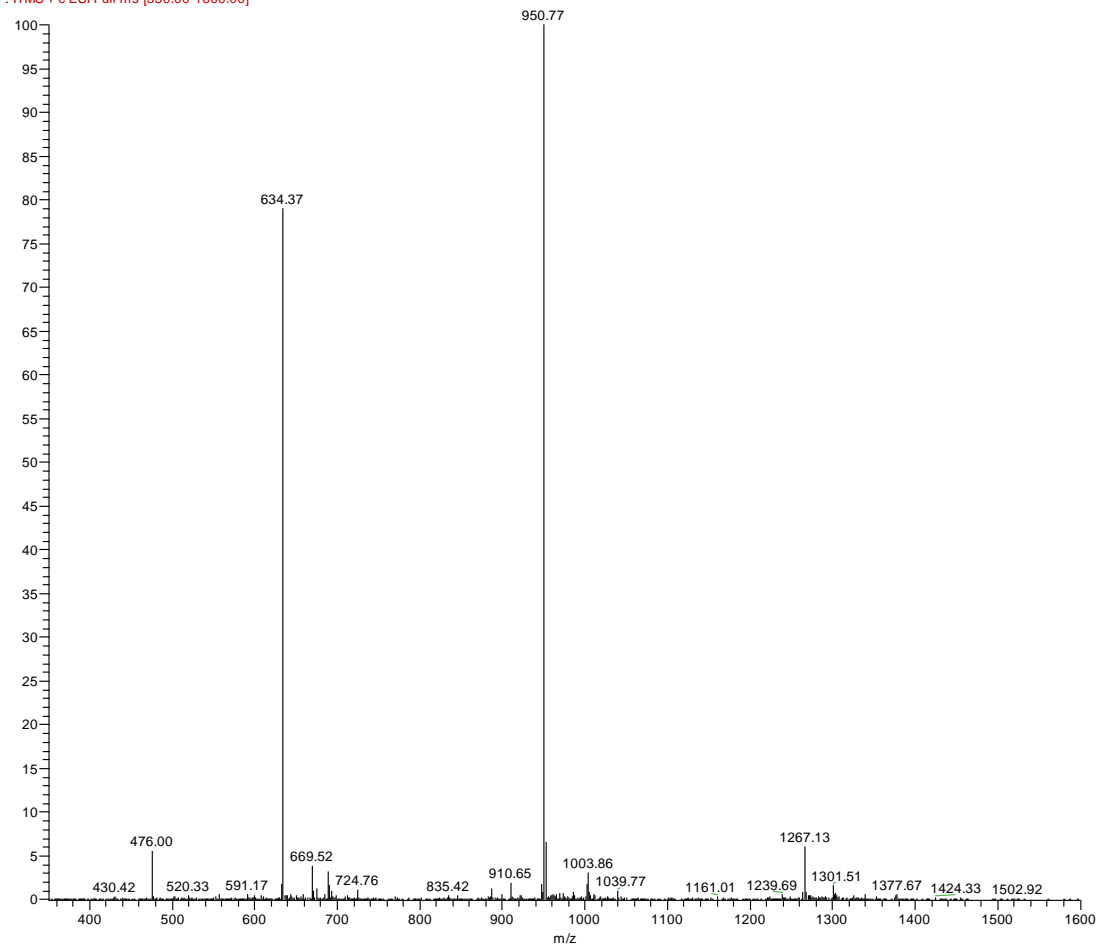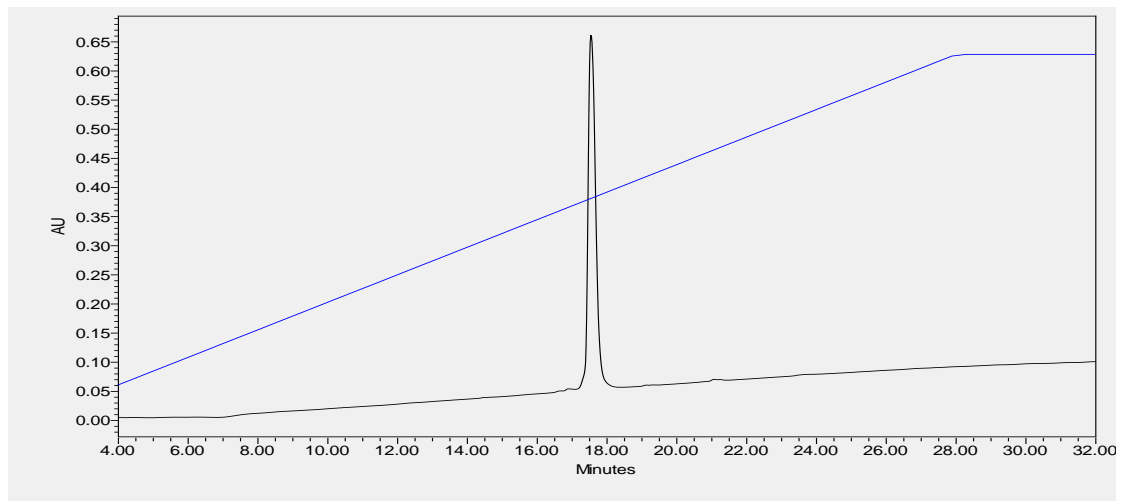

(h)



hhy\_200730154328 #756 RT: 9.65 AV: 1 NL: 3.12E4  
F: ITMS + c ESI Full ms [350.00-1600.00]

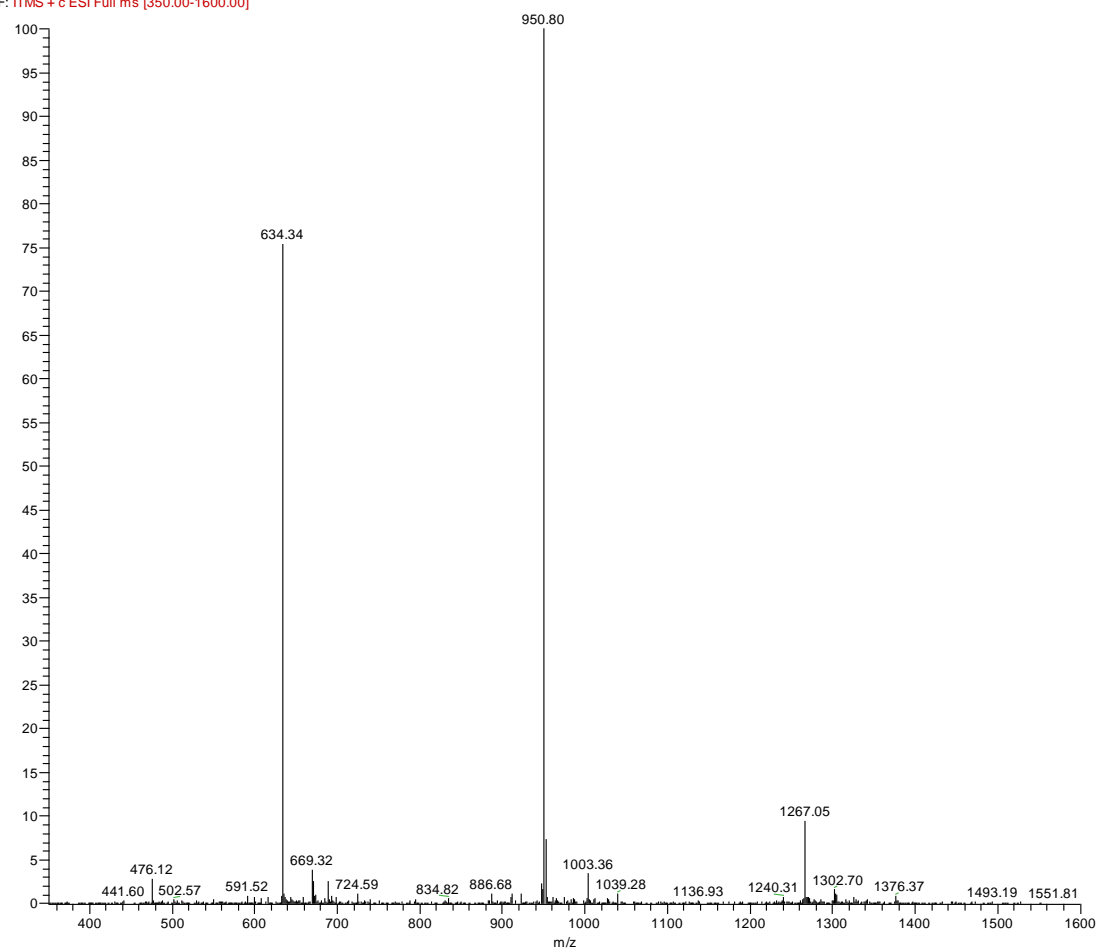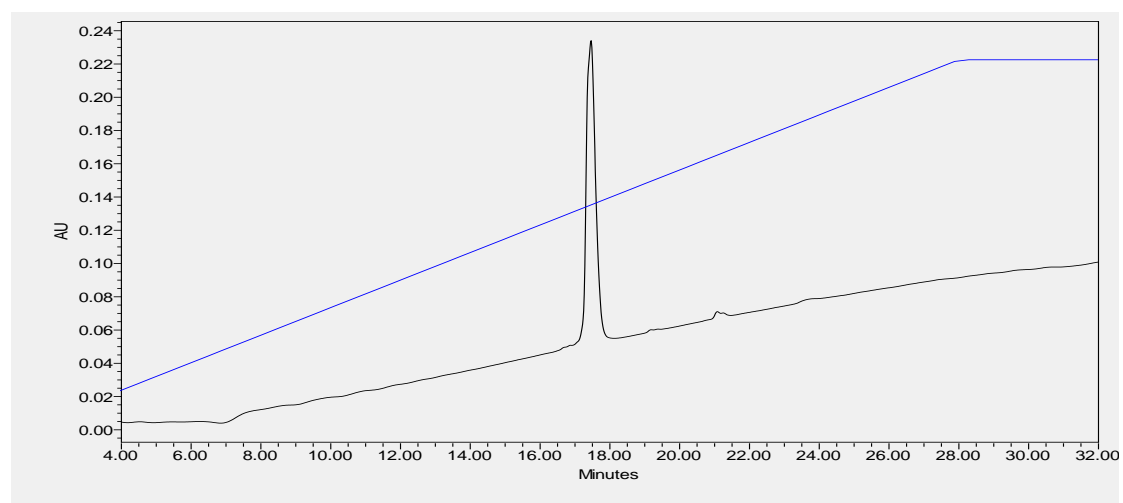

(i)

**Figure S1.** The RP-HPLC chromatograms and the mass spectra of all the synthetic peptides: B1A(a); B1A1(b); B1A2(c); KB2(d); KKB2(e); KWB2(f); KKWB2(g); KW<sup>3,5</sup>B2(h); KW<sup>5,7</sup>B2(i). The gradient of acetonitrile is indicated by the blue line.
